# Supplementary material for: Examining Factors of Engagement With Digital Interventions for Weight Management: Rapid Review
Source: PubMed Central journal article supplement (PMC5673884; doi:10.2196/resprot.6059), 2017-10-23
Supplement: resprot_v6i10e205_app1.pdf [file resprot_v6i10e205_app1.pdf]

## Quality Assessment Checklist – Systematic Review – digital interventions/apps

| Quality Criteria                                                                                                                          |                                                 |                                                 |                                                 |                                                    |                                  |                                                 |                                                 |                                    |                                                 |                                  |                                                 |
|-------------------------------------------------------------------------------------------------------------------------------------------|-------------------------------------------------|-------------------------------------------------|-------------------------------------------------|----------------------------------------------------|----------------------------------|-------------------------------------------------|-------------------------------------------------|------------------------------------|-------------------------------------------------|----------------------------------|-------------------------------------------------|
|                                                                                                                                           | Brindal (2012)                                  | Collins (2013)                                  | Dennison (2014)                                 | Gorton (2011)                                      | Lyden (2013)                     | McConnon (2009)                                 | Mhurchu (2014)                                  | Morrison (2014)                    | Patrick (2009)                                  | Tang (2015)                      | Watson (2015)                                   |
| <b>Purpose</b> (clear description of the purpose incl aims of study/digital intervention/app)                                             | Yes                                             | Yes                                             | Yes                                             | Yes (basic)                                        | Yes                              | Yes                                             | Yes                                             | Yes                                | Yes                                             | Yes                              | Yes                                             |
| <b>Study design</b> (appropriateness according to development & evaluation process for mhealth i.e. focus group, pre-testing, pilot, RCT) | Yes (RCT)                                       | Yes (RCT)                                       | Yes (RCT)                                       | Yes (mixed method-focus groups & telephone survey) | Yes (qualitative study)          | Yes (RCT)                                       | Yes (RCT)                                       | Yes (mixed methods)                | Yes (RCT)                                       | Yes (qualitative study)          | Yes (RCT)                                       |
| <b>Main methods</b> (clear description of study's methods and analysis)                                                                   | Yes (participants randomly allocated to groups) | Yes (participants randomly allocated to groups) | Yes (participants randomly allocated to groups) | Yes                                                | Yes (semi-structured interviews) | Yes (participants randomly allocated to groups) | Yes (participants randomly allocated to groups) | Yes (telephone interviews & usage) | Yes (participants randomly allocated to groups) | Yes (semi-structured interviews) | Yes (participants randomly allocated to groups) |



| <b>Features (description of digital intervention/app features &amp; components)</b> | Yes | Yes | Yes | N/A | Yes | Yes | Yes | Yes | Yes | N/A | Yes |
|-------------------------------------------------------------------------------------|-----|-----|-----|-----|-----|-----|-----|-----|-----|-----|-----|
| <b>Total Score</b>                                                                  | 7/8 | 7/8 | 8/8 | 4/4 | 6/8 | 8/8 | 8/8 | 8/8 | 7/8 | 4/4 | 7/8 |
